# Supplementary material for: Probabilistic analysis of a concrete column in an aggressive soil environment
Source: PubMed Central journal article supplement (PMC6407909; doi:10.1371/journal.pone.0212902), 2019-03-07

# American Manuscript Editors

## English Editing Certificate

This document certifies that the manuscript listed below was edited for proper English language, grammar, punctuation, and spelling by the expert staff at American Manuscript Editors.

### Manuscript Title:

Probabilistic analysis of a concrete column in an aggressive soil environment

### Authors:

Marek Wyjadlowski,  
Janusz Kozubal,  
Dmitri Steshenko

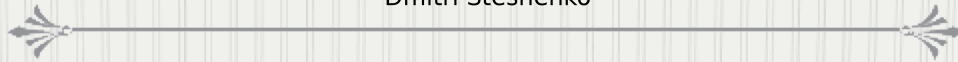

### Certificate Verification Key:

115-049-611-129-654

### Project Number:

57770

This certificate may be verified by emailing [info@americanmanuscripteditors.com](mailto:info@americanmanuscripteditors.com). Documents receiving this certificate should be prepared for publication. However, please note that the author has the ability to accept or reject our suggestions for changes and can make changes after the editing process is complete, all of which can adversely affect the quality of the text after the editing process.

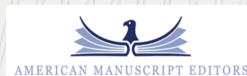

Supplement: pone.0212902.s006.pdf [file pone.0212902.s006.pdf]
